# Supplementary material for: Various miRNAs compensate the role of miR-122 on HCV replication
Source: PubMed Central journal article supplement (PMC7337399; doi:10.1371/journal.ppat.1008308), 2020-06-23
Supplement: ppat.1008308.s005.pdf [file ppat.1008308.s005.pdf]

**A**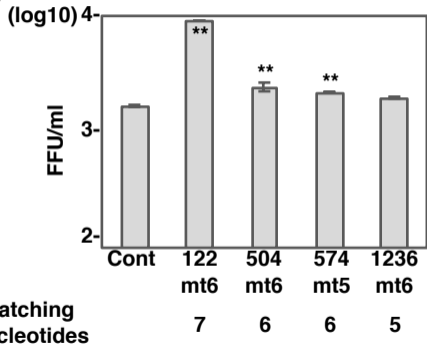

matching  
nucleotides

7

6

6

5

**B**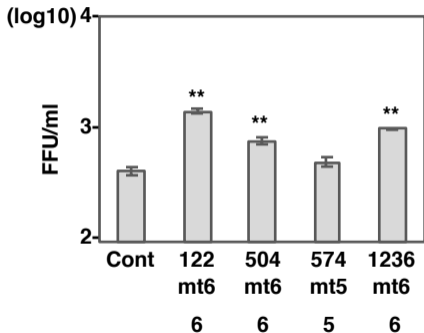

Cont

122

504

574

1236

mt6

mt6

mt5

mt6

6

6

5

6
