# Supplementary material for: Various miRNAs compensate the role of miR-122 on HCV replication
Source: PubMed Central journal article supplement (PMC7337399; doi:10.1371/journal.ppat.1008308), 2020-06-23

**A**

| HCV-RNA genotype1 | TSI  |
|-------------------|------|
| miR-122-5p        | 0.97 |
| miR-504-3p        |      |
| miR-574-5p        | 0.79 |
| miR-3659          |      |
| miR-1236-5p       | 0.68 |
| miR-4481          | 0.68 |
| miR-4745-5p       | 0.71 |
| miR-4765          |      |
| miR-6880-5p       | 0.56 |

5' stem loop

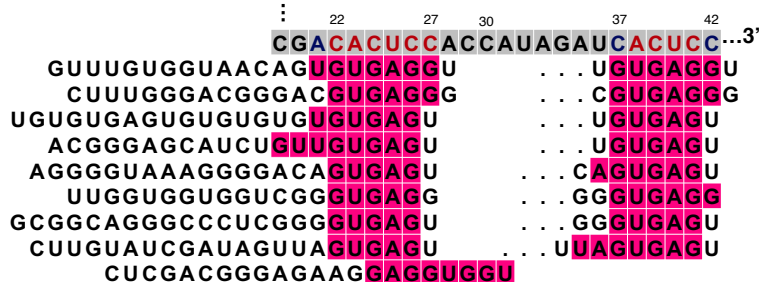

**B**

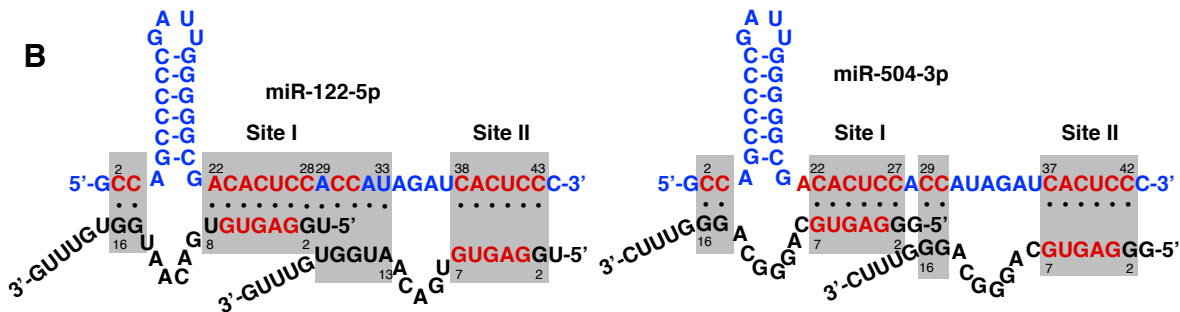

**C**

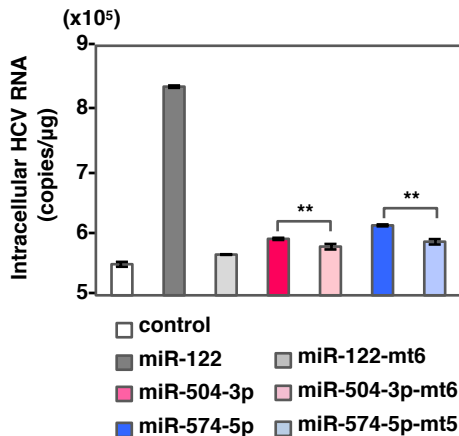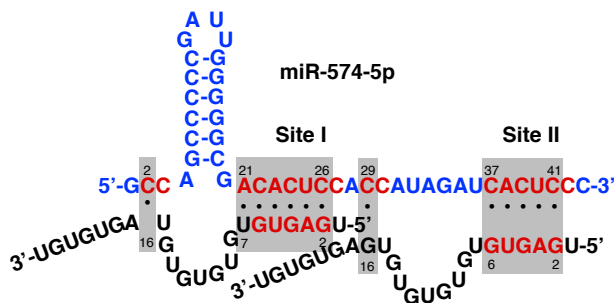

Supplement: ppat.1008308.s008.pdf [file ppat.1008308.s008.pdf]
