# Supplementary material for: Various miRNAs compensate the role of miR-122 on HCV replication
Source: PubMed Central journal article supplement (PMC7337399; doi:10.1371/journal.ppat.1008308), 2020-06-23
Supplement: ppat.1008308.s010.pdf [file ppat.1008308.s010.pdf]

| miR-122                                                                            | miR-25-5p                                                                           | miR-504-3p                                                                          | miR-122-GAGUG                                                                       | miR-652-3p                                                                           |
|------------------------------------------------------------------------------------|-------------------------------------------------------------------------------------|-------------------------------------------------------------------------------------|-------------------------------------------------------------------------------------|--------------------------------------------------------------------------------------|
|    |    |    |    |    |
|    |    |    |    |    |
|    |    |    |    |    |
|   |   |   |   |   |
|  |  |  |  |  |
