# Supplementary material for: Various miRNAs compensate the role of miR-122 on HCV replication
Source: PubMed Central journal article supplement (PMC7337399; doi:10.1371/journal.ppat.1008308), 2020-06-23

**A**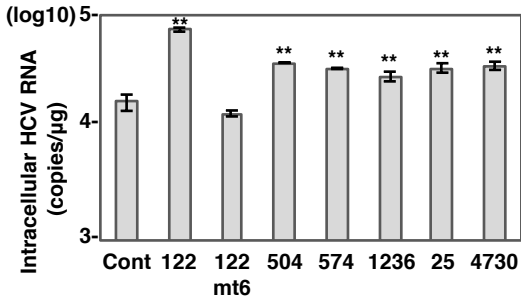**B**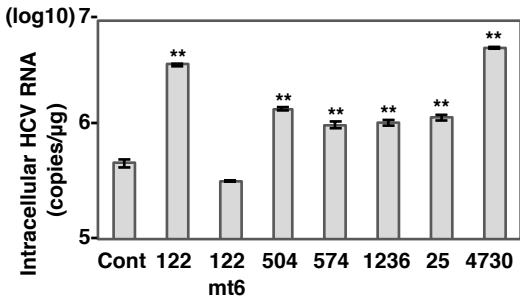

Supplement: ppat.1008308.s013.pdf [file ppat.1008308.s013.pdf]
